1

2

3

4     **A review of reviews exploring patient and public involvement in**  
5                                   **population health research**

6

7     Soo Vinnicombe<sup>1</sup>, Jane Noyes<sup>1\*</sup>

8     <sup>1</sup>School of Medical and Health Sciences, Bangor University, Bangor, UK

9

10

11

12

13

14

15

16     \*Corresponding author

17     Email: [Jane.Noyes@bangor.ac.uk](mailto:Jane.Noyes@bangor.ac.uk)

18

19

20

## Abstract

**Introduction:** Patient and public involvement (PPI) is increasingly seen as something that is integral to research and of importance to research funders. There is general recognition that PPI is the right thing to do for both moral and practical reasons. The aim of this review of reviews is to examine how PPI can be done ‘properly’ by looking at the evidence that exists from published reviews and assessing it against the UK Standards for Public Involvement in Research, as well as examining the specific features of population health research that can make PPI more challenging.

**Methods:** A review of reviews was carried out following the 5-stage Framework Synthesis method.

**Results:** In total 31 reviews were included. There is a lack of current research or clarity around Governance and Impact when findings are mapped against UK Standards for Public Involvement in Research. It was also clear that there is little knowledge around PPI with under-represented groups. There are gaps in knowledge about how to ensure key specific attributes of population health research are addressed for PPI team members – particularly around how to deal with complexity and the data-driven nature of the research. Two tools were produced for researchers and PPI members to further improve their PPI activity within population health research and health research more generally: A framework of recommended actions to address PPI in population health research, and guidance on integrating PPI based on the UK Standards for Public Involvement in Research.

**Conclusions:** Facilitating PPI in population health research is challenging due to the nature of this type of research and there is far less evidence on how to do PPI well in this context. The tools can help researchers identify key aspects of PPI that can be integrated when designing PPI within projects. Findings also highlight specific areas where more research or discussion is needed.

## Keywords

Public and patient involvement, involvement, PPI, population health research, review of reviews.

## Introduction

The focus of this review of reviews is on Public and Patient involvement (PPI) in population health research. PPI is increasingly seen as something that is integral to research and of importance to research funders. For our purposes, PPI is defined as: ‘Public involvement in research means research that is done ‘with’ or ‘by’ the public, not ‘to’, ‘about’ or ‘for’ them. It means that patients or other people with relevant experience contribute to how research is designed, conducted and disseminated. It does not refer to research participants taking part in a study. Public involvement is also different from public engagement, which is when information and knowledge about research is shared with the public (1). There is however sometimes confusion between what constitutes public engagement compared with involvement. In some countries, such as Canada, it is also common to use ‘public engagement’ to refer to public involvement (2). Similarly, the lines between stakeholder representation and public or patient representation can sometimes be blurred.

## Population health research

‘Population health’ is associated with several definitions and nuances and there is overlap with public health and aspects of more general health research. The King’s Fund describes population health as: ‘An approach aimed at improving the health of an entire population. It is about improving the physical and mental health outcomes and wellbeing of people within and across a defined local, regional or national population, while reducing health inequalities. It includes action to reduce the occurrence of ill health, action to deliver appropriate health and care services and action on the wider determinants of health. It requires working with communities and partner agencies (3). Public health, by comparison, can be defined as:

‘Activities to strengthen public health capacities and service aim to provide conditions under which people can maintain to be healthy, improve their health and wellbeing, or prevent the deterioration of their health. Public health focuses on the entire spectrum of health and wellbeing, not only the eradication of particular diseases (4).

Some refer to Public Health (note the capitalisation) as specifically about activities and interventions carried out by government agencies, health professionals, or other centralised bodies whereas population health includes other, non-health related, influences such as housing, transport and education. In reality, these various definitions can oversimplify our understanding and a rigid adherence to a perceived difference between the terms may serve to disguise relevant information about successful PPI activity. As Diez-Roux argues, ‘Much of this is a semantic discussion. What really matters are the questions we pose regarding the health of the public, the answers we obtain, and the actions we take in response. Whether we call this approach public health or population health is, in all honesty, irrelevant (5).

## **Specific challenges of integrating PPI in population health research**

Population health research, or health research that considers population level questions, provides challenges in terms of PPI that are not always present in condition-specific research projects. For example:

- **Duration.** Population health research often looks at health variables across a long period of time. This makes recruiting and retaining suitable PPI representation across the length of the project more challenging. Changes in personnel, in all parts of the research team and partners, can be expected in any project.
- **Complexity.** Population health is often multi-disciplinary and looks at health as the product of multiple determinants (such as biology, genetics, behaviours, social and environmental aspects) as well as looking at their interactions among individuals and groups and across time

100 and generations. With all these different variants involved it can be difficult for a lay person  
 101 to understand the complexity – or, to put it another way, for the researchers to explain the  
 102 research in a way that a lay person can understand. It may often be the case that a different  
 103 skill set, and therefore potentially a different person, is necessary at different stages of the  
 104 research or for different workstreams – something that applies to researchers as well as to PPI  
 105 representatives.

- 106 • Data-driven. Population health projects are often driven by large datasets and can involve  
 107 knowledge of algorithms, advanced statistics, and analytical techniques that can be unfriendly  
 108 to the non-mathematically minded. It can be a challenge for researchers to ‘translate’ both the  
 109 process and the outcomes of their research in terms that can be more widely understood. This  
 110 is one reason why PPI can be so helpful in such projects. For example, helping to design  
 111 dissemination activity that is meaningful to a broad audience.
- 112 • Representation. Population health research often addresses large and diverse  
 113 population groups within the populations being researched, which raises issues about the PPI  
 114 being representative. Even within disease-specific studies it is often difficult, if not practically  
 115 impossible, to recruit someone who truly represents the breadth of people with a certain  
 116 condition. Once that issue is expanded out to wider populations, the issue of true  
 117 representation is multiplied many times. Representation becomes particularly difficult with  
 118 certain demographic groups which may be grouped together for convenience, but which  
 119 might hide a variety of differences. A prime example of this is the involvement of Black,  
 120 Asian and Minority Ethnic (BAME) individuals – recruiting a single person of BAME  
 121 background risks subsuming important differences according to specific cultural, genetic,  
 122 class, education and other factors. There is also an ongoing debate about terminology such as  
 123 ‘hard to reach’, ‘under-represented’, ‘seldom heard’ and ‘under-served’ which often have  
 124 problematic resonances (6). One way to think of this is that ‘[t]he key idea here is that the  
 125 definition of ‘under-served’ is highly context-specific; it will depend on the population, the  
 126 condition under study, the question being asked by research teams, and the intervention being  
 127 tested. No single, simple definition can encompass all under-served groups (7).

## **The need for a review of reviews**

As described above, population health presents specific challenges for researchers and there is a lack of guidance on doing PPI well in population health research. Scoping searches identified a number of reviews of PPI involvement covering population health, public health as well as other more general reviews that included population and public health studies of interest. None of the published reviews had a specific focus on what worked to deliver optimal PPI in population health research. We therefore decided to undertake a review of reviews to explore the challenges and solutions to carrying out PPI well in population health research. Findings were then developed into two tools for researchers and PPI members to further improve the quality of PPI activities in population health research.

## **Materials and methods**

This review of reviews assembled and interpreted the evidence on PPI involvement in population health research. Question formulation was underpinned by the ECLIPSE (Expectation, Client Group, Location, Professionals and Service) framework that is acknowledged to be most suitable for searching for health policy or health management information (8).

We developed the following question: What evidence exists concerning the successful development, implementation and evaluation of patient and public involvement activity or models in population health research in the UK and equivalent health systems?

## **Inclusion criteria**

- Type of study: systematic and other reviews that focus on the concept of, or approaches to, PPI and/or PPE (patient and public engagement) across population health, public health, health and social care. Limited to systematic reviews, narrative reviews, literature reviews, bibliometric reviews, scoping reviews and meta-analyses. Quantitative, qualitative and mixed-methods reviews were of interest.
- Setting: any organisational setting that includes population health, public health, health or social care aspects (e.g., primary care, mental health, hospital, tertiary care, voluntary, etc.).
- Type of involvement: not just being part of the research as a participant but being involved in part or all of the following stages – research development, research monitoring, research analysis and dissemination.

## Exclusion Criteria

- Articles not in English.
- Reviews published before 2010. However, the timeframes for the primary studies included in the reviews vary and can go back to the inception of various databases. This timeframe was considered appropriate as public and patient involvement is something that has been developing rapidly in recent years and was not really established as a well-recognised term before then.

## Search Strategy

An information scientist undertook the initial search of the Medline and PubMed databases. The full search strategy is included in Supporting Information 1. The Involve Evidence Library was searched for ‘systematic reviews’. Note that this library currently (September 2021) only includes references up to 2015.

The original search was done in May 2020 with a follow up search (stages 2 and 3) carried out early in September 2021 to pick up new reviews up to end of August 2021.

## Screening

Titles and abstracts were screened to identify reviews that met the inclusion criteria. Potentially relevant reviews were retrieved and the full text assessed for inclusion (Figure 1). The process was undertaken by SV and independently checked by JN.

## Quality appraisal

Originally the AMSTAR2 (9), method was trialled on six reviews but as most of the included reviews were qualitative rather than quantitative many of the AMSTAR2 domains did not apply so we switched to using CASP for systematic reviews (10). Included reviews were quality appraised by SV and independently checked by JN (Supporting Information 2). Reviews were not excluded at this stage on methodological grounds as the focus was on PPI processes reported in the review.

## Data extraction and synthesis

Studies included in source reviews were mapped for duplication and this was taken account of in the analysis and synthesis. As this review of reviews did not require a transformative method of data synthesis to better understand the descriptive accounts of PPI in the source reviews, we selected the aggregative 5-stage framework synthesis method for integrating evidence of interest from diverse review designs.

It is a matrix-based method involving the construction of a priori thematic categories into which data can be coded. The five stages are:

- Familiarisation
- Identifying a thematic framework
- Indexing
- Charting



- 208 • Mapping and interpretation (11)

209 Initial data extraction was carried out against a framework designed by the authors based on close  
210 examination of background literature and initial review readings (Table 1).

211 **Table 1. Initial framework: headings and details**

| Main info                                                | Title<br>Authors                                                                                                                                                                                                                     |
|----------------------------------------------------------|--------------------------------------------------------------------------------------------------------------------------------------------------------------------------------------------------------------------------------------|
| Extracted information                                    | Year published<br>Type of review<br>Area of focus<br>No. of studies<br>No. of papers<br>Full list<br>Databases searched<br>Other searches<br>Years searched<br>Exclusions<br>Geography<br>Methods used<br>Included PPI in own review |
| Why do PPI?                                              | Attribute<br>Who benefits?<br>Evidence for<br>Evidence against                                                                                                                                                                       |
| How to do PPI – especially in population health research | Attribute – barrier<br>Stage affected<br>Mitigation<br>Attribute - facilitator<br>Stage affected<br>Good practice                                                                                                                    |
| Terminology                                              | Types of PPI<br>Stages of research<br>Other                                                                                                                                                                                          |
| Other                                                    | Gaps in Knowledge<br>Country specific legislation/ guidance<br>Case studies?                                                                                                                                                         |

212  
213 Extracted data were subsequently mapped against a second framework (Table 2) and matched against  
214 the UK Standards for Public Involvement.

215 **Table 2. Secondary framework: thematic mapping**

| Challenges |         |             | Solutions |          |         |
|------------|---------|-------------|-----------|----------|---------|
| Study id   | Problem | Consequence | Study id  | Solution | Details |

216

217 The UK Standards for Public Involvement are:

- 218 • Inclusive Opportunities - Offer public involvement opportunities that are accessible and that
- 219 reach people and groups according to research needs.
- 220 • Working Together - Work together in a way that values all contributions, and that builds and
- 221 sustains mutually respectful and productive relationships.
- 222 • Support and Learning - We offer and promote support and learning that builds confidence and
- 223 skills for public involvement in research.
- 224 • Governance - Involve the public in research management, regulation, leadership and decision
- 225 making.
- 226 • Communications - Use plain language for well-timed and relevant communications, as part of
- 227 involvement plans and activities.
- 228 • Impact - Seek improvement by identifying and sharing the difference that public involvement
- 229 makes to research (12).

230

## 231 **Public and patient involvement**

232 This review of reviews was discussed with the Centre for Population Health Patient and Public  
 233 Involvement Advisory Group, which meets quarterly to help set the strategic direction for PPI within  
 234 the Centre. The draft review was read and commented on several times throughout its development  
 235 by two PPI advisory group members.

236

## Results

Thirty-one reviews were included covering around one thousand individual studies, which were mainly based in the UK or USA. We took note of any duplication of studies across reviews to ensure that we were not double counting the evidence.

The studies covered a range of settings and subject areas (Supporting Information 3). Reviews varied in quality (Supporting Information 2) but as the review methods and findings were not the primary phenomenon of interest we did not place a lot of emphasis on the quality of the source reviews when interpreting findings.

Specifically, the reviews covered, to varying degrees, three out of the four challenges, outlined earlier, that set population health research apart from many other research types.

**Representation** was extensively discussed in the studies reviewed. It is an aspect of PPI that does not have a simple solution for any type of research project. For population health projects that tend to be longer in duration, it may be that different people need to take part in different periods of the project and, for complex projects, that different people need to be involved in different work streams. Boote (13) notes that there is a concern that PPI representatives taking part in research over time may become ‘professionalised’ and come to see things from the point of view of the research team rather than as a member of the public or patient demographic.

**Complexity** was also discussed when talking about support and learning requirements for PPI members. Population health projects are often highly complex but, given the right support and training, that is not a sufficient reason to exclude PPI activity.

The **data-driven** aspect was touched upon mainly in terms of ensuring that project specific training and support was available. Many population health projects include aspects of Big Data which can add a layer of difficulty to PPI activity, but which can also be addressed by considering tailored training and support. Having non-data experts involved in such projects may help when designing

261 dissemination and communication activities around the project so that they can eventually be more  
262 accessible to a wider audience.

263 **Duration** was the only aspect that was not specifically discussed in the reviews and in finding  
264 solutions. It is possible to postulate that building relationships and strong ways of working together  
265 may help to address this issue. But also, that acknowledging upfront the changing requirements of a  
266 long-term project will help researchers to plan accordingly – including planning for long term PPI.

## 267 **Common issues across PPI activity in population and other types of health research**

268 There are several aspects of PPI activity that are common across various types of health research,  
269 including, but not exclusive to, population health research.

## 270 **Challenges**

271 Just over half of the reviews (18 out of 31 (14-31)) noted a range of potential challenges with PPI that  
272 were reported to stand in the way of the successful development, implementation and evaluation of  
273 patient and public involvement activity or models in health research in the UK and equivalent health  
274 systems.

275 Consolidation of the challenges reported in the reviews suggested that the following (Table 3) were  
276 the key issues. These have been grouped into appropriate headings.

277

278 **Table 3. Full list of challenges identified**

| Heading          | Sub-heading                           | Reviews                        |
|------------------|---------------------------------------|--------------------------------|
| <b>Resources</b> | Lack of budget                        | 14, 16, 18, 19, 20, 25, 27, 28 |
|                  | Lack of time                          | 14, 16, 18, 19, 20, 25, 27     |
|                  | Emotional burden on PPI members       | 14, 20, 21, 25                 |
|                  | Complicated logistics/ infrastructure | 16, 19                         |
|                  | Workload too high (on all sides)      | 20, 23                         |
|                  | Lack of incentives                    | 16                             |
|                  | Lack of preparation                   | 14                             |
|                  | Lack of staff continuity              | 16                             |
|                  | Lack of support for PPI members       | 24                             |
|                  |                                       |                                |

|                             |                                                                           |                                |
|-----------------------------|---------------------------------------------------------------------------|--------------------------------|
|                             | Scope creep <sup>1</sup>                                                  | 26                             |
| <b>Conflict and control</b> | Allowing power to be shared with PPI                                      | 14, 15, 16, 17, 19, 21, 22, 25 |
|                             | Expectations (from all sides)                                             | 14, 16, 20, 21, 27, 29         |
|                             | Conflicting perspectives                                                  | 15, 16, 19, 23, 24             |
|                             | A culture of researchers vs PPI members                                   | 14, 16, 20                     |
|                             | Ethical concerns                                                          | 24, 25                         |
|                             | Challenging the establishment                                             | 14                             |
|                             | Differences within communities                                            | 14                             |
|                             | Accepting the legitimacy of PPI                                           | 19                             |
|                             | Prioritising personal experience                                          | 18                             |
|                             | Scepticism (from all sides)                                               | 14                             |
|                             | Unresolved conflict                                                       | 31                             |
| <b>Knowledge</b>            | Processes                                                                 | 14, 16, 19, 25, 27             |
|                             | Language/ jargon                                                          | 14, 15, 18, 19, 27             |
|                             | Lack of skills or training                                                | 14, 19, 23, 24, 25             |
|                             | Administration issues                                                     | 17                             |
|                             | Working practices                                                         | 14                             |
| <b>Representation</b>       | Reflecting the diversity of affected populations                          | 14, 17, 18, 19, 23, 25, 27, 30 |
|                             | Tokenism of PPI (aka box-ticking)                                         | 22, 24, 26                     |
|                             | Getting early-stage involvement                                           | 17, 22                         |
|                             | Involving children                                                        | 19                             |
|                             | Protecting anonymity                                                      | 25                             |
|                             | Accessibility (venues)                                                    | 28                             |
| <b>Communication</b>        | Lack of meaningful and timely communication leading to disenfranchisement | 14, 17, 21                     |
|                             | Difficulty reporting impact of PPI                                        | 15, 24, 25                     |
|                             | Building relationships to sustain involvement                             | 16, 19                         |
|                             | Transparency of research process                                          | 23                             |
|                             | Building trust (on all sides)                                             | 16                             |
|                             | Different values within team                                              | 27                             |

279

280 Many of these challenges will be even more apparent in population health research where projects  
 281 tend to face the four challenges of: longer duration, involving more complex and varied processes,  
 282 alongside issues of big data, and finding appropriate representation to cover the project breadth and  
 283 length.

<sup>1</sup> When a project outgrows its original remit without any additional resources being available.

## Solutions

Nearly three quarters of the studies (23 out of 31) (2, 16-18, 20-38) noted a range of potential solutions for ensuring that PPI was more likely to be successful.

These proposed solutions have been collated, consolidated and sorted according to the UK Standards for Involvement in Research as follows:

## Inclusive Opportunities

Solution: Offer public involvement opportunities that are accessible and that reach people and groups according to research needs. Research also needs to be informed by a diversity of public experience and insight, so that it leads to treatments and services which reflect these needs.

Eleven reviews mentioned inclusion (17-18, 20-21, 24, 29, 33-34, 36-38). Key themes emerged from these studies and these are outlined in Table 4 below and explicitly addressed the problem area of Representation.

**Table 4. Solutions – Inclusive opportunities**

| Attribute                       | Study/Studies         | Examples of reasoning                                                                                                                                                                                                                                                                                                                                   |
|---------------------------------|-----------------------|---------------------------------------------------------------------------------------------------------------------------------------------------------------------------------------------------------------------------------------------------------------------------------------------------------------------------------------------------------|
| Representation and/or diversity | 15, 19, 28, 31-33     | Use variety of methods (37) and partners (24) to recruit a range of participants, understand different motivations (20) and gain insight into the community (33), view differing perspectives as valuable (36), recognise and address issues concerning diversity (36), avoid tokenism (20)                                                             |
| Community consultation          | 18, 24, 30, 33-34, 37 | To fit better with wider community context (33), include relevant stakeholders and agencies (33) also clinicians, charities, specialist support services (37) plus patient and advocacy groups (24), be proactive and go out and get involved, don't expect people to come to you (34), build more meaningful relationships with target population (30) |
| Accessibility                   | 20-21, 34, 37         | Venues should be located for the ease of the participants (20), accessible and meetings should be timed appropriately (37) and include communication aids, breaks and refreshments as appropriate (21) for individual and collective needs (34)                                                                                                         |
| Methods of                      | 17, 21, 37            | Online could assist people to be included e.g. illness, time, caring (17), especially working with disabled children and                                                                                                                                                                                                                                |

|                  |           |                                                                                                                                                                |
|------------------|-----------|----------------------------------------------------------------------------------------------------------------------------------------------------------------|
| engagement       |           | young people be flexible for different abilities and ages and offer choice (21), use variety of methods (37)                                                   |
| Recruit well     | 20, 37-38 | Fit skills and experiences to the project as well (20), recruit through a variety of ways (37), need to be not just representative but also collaborative (38) |
| Safe environment | 21        | Consider whether a trusted adult or facilitator is useful (21)                                                                                                 |

298

## 299 **Working Together**

300 Solution: Work together in a way that values all contributions, and that builds and sustains mutually

301 respectful and productive relationships. Public involvement in research is better when people work

302 together towards a common purpose, and different perspectives are respected.

303 Twenty-one reviews (2, 16-18, 20-21, 23-29, 31-38) discussed aspects of this standard. The main

304 areas of discussion are outlined in Table 5 below and explicitly addresses the problem area of Conflict

305 and Control.

## 306 **Table 5. Solutions – Working Together**

| Attribute     | Study/Studies                      | Examples of reasoning                                                                                                                                                                                                                                                                                    |
|---------------|------------------------------------|----------------------------------------------------------------------------------------------------------------------------------------------------------------------------------------------------------------------------------------------------------------------------------------------------------|
| Relationships | 2, 16, 18, 20-21, 24-29, 31-36, 38 | Manage conflict (28, 33, 38), Take time to build partnerships built on joint ownership, trust, respect and transparency (2, 16, 18, 21, 24-27, 29, 31-36, 38), Empower PPI members by sharing power and knowledge (21, 32, 34-36), Explore risks together (24), Consider capacity of PPI members (24-25) |
| Resources     | 2, 18, 20-21, 24-28, 32, 34, 37    | Budget/ funding (18, 20-21, 25, 27-28, 32, 34), Time to build relationships, communicate etc. (2, 18, 20-21, 25-27, 32, 34), Use existing PPI resources where available (37), Plan into proposals (24-25), Tailor to project (34)                                                                        |
| Engagement    | 2, 16-18, 20, 23-24, 29, 38        | Early on (2, 17-18, 23, 38), Multiple and varied opportunities (16, 29, 38), Appropriate (20, 24), Acknowledge contributions (17, 24, 38)                                                                                                                                                                |
| Clarity       | 2, 16, 18, 25-26, 29, 36, 38       | Roles (2, 16, 18, 25, 36, 38), Expectations (16, 26, 29, 36), Structures (2)                                                                                                                                                                                                                             |
| Flexibility   | 17, 20-21, 24-25                   | Confidence, personal circumstances and capacity may change over time (17, 21, 25), Keep tasks flexible and include time for training and questions (24), In attitude and approaches to the project (25)                                                                                                  |

307

## 308 **Support and Learning**

309 Solution: Offer and promote support and learning that builds confidence and skills for public

310 involvement in research. Seek to remove practical and social barriers that stop members of the public

311 and research professionals from making the most of public involvement in research.

312 The following seventeen reviews mentioned various aspects of support and learning (2, 16, 18, 21-22,

313 24-25, 27-29, 32-38). The results are shown in Table 6 below. The table is split into two sections to

314 reflect differences between support and learning methods, and explicitly addresses the problem area

315 of Knowledge.

316 **Table 6. Solutions – Support and learning**

| <b>SUPPORT - Attribute</b>  | <b>Study/Studies</b>        | <b>Examples of reasoning</b>                                                                                                                                                                            |
|-----------------------------|-----------------------------|---------------------------------------------------------------------------------------------------------------------------------------------------------------------------------------------------------|
| Emotional support           | 2, 13, 19, 24, 28-29, 31-32 | Recognise that experiences may be upsetting (18), Provide safe spaces (33), Provide consistent feedback and support (24), Consider how to deal with anxiety (29)                                        |
| Practical support           | 24, 34-36                   | Think about details e.g. childcare, food, location, transport, compensation, timings (35), Have strategies for when people are ill/ can't take part (24)                                                |
| Structural support          | 16, 25, 36                  | Make sure key project individuals support PPI (16), Provide structures that support PPI (36), Include relevant institutions such as charities, volunteer groups etc. (25)                               |
| Specific support            | 29, 33                      | Ensure support specific to topic area (29) and to their individual involvement (33).                                                                                                                    |
| <b>LEARNING - Attribute</b> | <b>Study/Studies</b>        | <b>Examples of reasoning</b>                                                                                                                                                                            |
| As appropriate              | 2, 18, 27, 32-33, 36-38     | Make learning relevant to the specific context of the research (2, 27, 33) and at the appropriate level for the PPI member (33) to allow full participation (38) and to build participant capacity (18) |
| Formal knowledge            | 16, 25, 32, 34              | Formal development of knowledge and skills (16), supporting participants to be informed and make informed decisions (25) and to understand specific parts of the research process and/or context (32)   |
| Research methods            | 22, 32, 37-38               | Training in research components to give confidence in their involvement (32) and to explain 'rules' and constraints of                                                                                  |



|                             |                |                                                                                                                                                   |
|-----------------------------|----------------|---------------------------------------------------------------------------------------------------------------------------------------------------|
|                             |                | research (22)                                                                                                                                     |
| Variety of learning methods | 24, 29, 34-35  | Use a variety of methods such as supervision, mentoring, formal, workshops and team based (35), include everyone on the team if possible (24, 34) |
| Share knowledge             | 32-33          | Acknowledge that knowledge and experience flow both ways and make ways to facilitate that flow (33)                                               |
| General                     | 21, 25, 28, 34 | Provide, support and fund training and learning opportunities (25).                                                                               |

317

## 318 **Governance**

319 Solution: Involve the public in research management, regulation, leadership and decision making.

320 Public involvement in research governance can help research be more transparent and gain public  
321 trust. This section explicitly addresses the problem area of Conflict and Control. Only three of the  
322 reviews mentioned governance (2, 24, 35). They discuss the need for shared decision making (at  
323 every level), power and leadership, in order to lead to a culture of deeper involvement. As limited  
324 suggestions were reported there is no table for this section.

## 325 **Communications**

326 Solution: Use plain language for well-timed and relevant communications, as part of involvement  
327 plans and activities. Communicate with a wider audience about public involvement and research,  
328 using a broad range of approaches that are accessible and appealing.

329 Nine of the reviews discussed communication as being important to ensure PPI activity is successful  
330 (2, 20, 24-25, 27, 32, 34-35, 37). Various attributes of good communication are discussed with the  
331 main points as in Table 7 below, and explicitly addresses the problem area of Communications.

332 Table 7. Solutions - Communications

| Attribute                 | Study/Studies | Examples of reasoning                                                                                                                        |
|---------------------------|---------------|----------------------------------------------------------------------------------------------------------------------------------------------|
| Listen, act and feed back | 24, 27, 34-35 | Helps address issues such as power (35), let people know what you are doing with their suggestions and why (24), ensures accountability (27) |
| Ongoing/ regular updates  | 25, 32, 37    | Contribute to motivation and engagement, and                                                                                                 |

|                                                             |            |                                                                                                                                                                                                                   |
|-------------------------------------------------------------|------------|-------------------------------------------------------------------------------------------------------------------------------------------------------------------------------------------------------------------|
|                                                             |            | to foster satisfying partnerships (32)                                                                                                                                                                            |
| Creating space to voice concern/ open communication climate | 20, 24, 32 | Contribute to motivation and engagement, and to foster satisfying partnerships (32)                                                                                                                               |
| Avoid/ translate jargon                                     | 24-25, 32  | Ensuring everyone understood and felt comfortable and confident to engage in meaningful dialogue (32)                                                                                                             |
| Use different materials (not just written reports etc)      | 32, 34, 37 | Ensure people with different levels of literacy can participate (32)                                                                                                                                              |
| Sharing information, experiences and knowledge              | 2, 34      | Across all groups involved (2)                                                                                                                                                                                    |
| Clarifying and agree expectations upfront                   | 24, 32     | Could avoid conflicts, demotivation, dissolution of partnerships, or frustration in situations where stakeholders could perceive a lack of concrete actions (32), patients are 'partners' not 'are involved' (24) |
| Have stakeholders lead groups                               | 32         | But be careful they include all groups in the discussion (32)                                                                                                                                                     |

## Impact

Solution: Seek improvement by identifying and sharing the difference that public involvement makes to research. Understand the changes, benefits and learning gained from the insights and experiences of patients, carers and the public.

Seven of the reviews discussed impact (2, 20, 24, 32, 34-35, 38). The general theme was that impact needs to be better evaluated throughout the whole research lifecycle. It was noted that this is an area where the existing literature is scant and current working practices are perceived to be lacking in terms of rigour.

Evaluating impact through continuous assessment and feedback was seen to be important in order to ensure ongoing involvement, to identify best practice and areas for improvement, and to make sure that the experience is working for everyone involved.

In addition to evaluating the process of PPI within health research, it was also noted that the impact of findings that are translated to real world setting, and ideally the contribution of PPI activity to that impact, should also be evaluated.

It is important to note that impact can be positive or negative and that impact may happen in a complex way and to a range of areas, for example, impact on the research, on the research outcomes, on the researchers, on the PPI members, on the wider community and stakeholders.

## Other issues

Interestingly considering the topic of the reviews, the use of PPI members in the reviews was not universal.

- 9 reviews described PPI throughout the review process
- 3 reviews took their findings to PPI members for discussion
- 3 reviews made use of external panels or organisations
- Single reviews reported utilising PPI at specific stages:
  - To identify research questions
  - Reviewing protocol
  - During execution and translation
  - Reviewing the process
  - Feedback from stakeholder but stage not stated
- 2 reviews mentioned that there had not been any PPI in the review
- 9 reviews did not mention PPI in their own review process at all.

Few of the reviews detailed the studies discussed within them in terms of types of PPI or in terms of stages of research although most included some discussion of these areas in general terms. Dawson et al (39) is one exception where the studies are clearly detailed in terms of what PPI groups or individuals were involved in various tasks.

There was no consistent terminology used for either types of PPI or stages of research. There has been some attempt to categorise these at a national level. For example, in the UK, INVOLVE distinguished between three PPI approaches: consultation, collaboration and user-led; while Health Canada divides PPI into five stages: inform or educate, gather information, discuss, engage and partner (Pii)(40).

Crocker et al (41) describes the types of involvement covered in the studies to range ‘from one person to many people or whole patient organisations, from one-off involvement in a particular aspect of the trial (for example, reviewing draft information for patients or recruiting participants from their communities) to involvement throughout the trial (for example, as members of a trial steering committee), and from involvement with no decision making power (for example, as advisers) to involvement in decision making as equal partners’.

Some examples of stages of research where PPI could be included were described as below in Table 8.

**Table 8. Examples of stages of research**

| Wilsher (23)                                                                                                                                                                                                                  | Domecq (26)                                                                                                                                                                                                                                                                                 | Pii (40)                                                                                                                                                                                                                                                                                                                                                                                            |
|-------------------------------------------------------------------------------------------------------------------------------------------------------------------------------------------------------------------------------|---------------------------------------------------------------------------------------------------------------------------------------------------------------------------------------------------------------------------------------------------------------------------------------------|-----------------------------------------------------------------------------------------------------------------------------------------------------------------------------------------------------------------------------------------------------------------------------------------------------------------------------------------------------------------------------------------------------|
| <ul style="list-style-type: none"> <li>Identify/prioritise</li> <li>Design</li> <li>Grant development</li> <li>Undertake/Manage</li> <li>Analysing/interpret</li> <li>Dissemination</li> <li>Monitoring/evaluation</li> </ul> | <p>1) Preparatory phase (agenda setting, prioritization of research topics and funding).</p> <p>2) Execution phase (study design &amp; procedures, study recruitment, data collection, and data analysis).</p> <p>3) Translation phase (dissemination, implementation, and evaluation).</p> | <p>1. Development of research focus<br/>Research definition<br/>Research prioritization</p> <p>2. Development of research design<br/>Method development<br/>Study design development</p> <p>3. Recruitment<br/>Recruitment strategy<br/>Recruitment</p> <p>4. Data generation</p> <p>5. Data processing/ Analysis</p> <p>6. Research dissemination<br/>Dissemination<br/>Dissemination strategy</p> |

## Discussion

### Population Health

This review of reviews set out to see what evidence there was concerning optimising patient and public involvement specific to population health research. The novelty in this review of reviews is twofold: firstly, that the findings have been framed by the UK Standards and secondly, that the challenges have been matched against potential solutions. Most reviews were about PPI activity in specific thematic healthcare areas or in general health and social care research but the details of the

studies included in the reviews makes it clear that many studies included were of direct relevance to population health research. The findings are, therefore, both generic across health and social care research as well as providing useful evidence-based suggestions as to what works in PPI in population health research.

## Comparing findings with recently published primary studies

Looking at recently published primary studies we found several of interest, mainly around data-driven population health research. The principles that emerge from these studies fit well with the findings of the review of reviews, but also suggest that there are a variety of approaches through which PPI can be addressed and improved. We summarise recent primary studies in Table 9.

**Table 9. Specific population health primary studies addressing PPI.**

| Population Health Specific PPI Challenge Area | Study              | Aspects of note                                                                                                                                                                                                                                                                                                                                                                                                                                                                                                                                                                                                                                                              |
|-----------------------------------------------|--------------------|------------------------------------------------------------------------------------------------------------------------------------------------------------------------------------------------------------------------------------------------------------------------------------------------------------------------------------------------------------------------------------------------------------------------------------------------------------------------------------------------------------------------------------------------------------------------------------------------------------------------------------------------------------------------------|
| Data-driven                                   | Johnson et al (42) | <ul style="list-style-type: none"> <li>• There is little guidance on how to meaningfully involve the public in big data research.</li> <li>• Involvement in big data research is significantly limited in comparison with other study designs.</li> <li>• May be because common approaches to public involvement adopted in primary data research are not appropriate within big data analysis studies.</li> <li>• The highly data driven discussions that underline this type of research can present a barrier to public involvement.</li> <li>• There is now growing recognition that public involvement in big data research requires special considerations.</li> </ul> |
| Data-driven                                   | Hobbs et al (43)   | <p>Enhance public forum members' personal development in data-intensive health research through a personal development portfolio:</p> <ul style="list-style-type: none"> <li>• Personal Profile - Personal details including education, qualifications and employment</li> <li>• Relevant Experience - Volunteering and personal experience</li> <li>• Training Record - Training events attended and events where been trainer or facilitator</li> <li>• Personal statement - Overall description of skills and</li> </ul>                                                                                                                                                  |

|                              |                                                                                                              |                                                                                                                                                                                                                                                                                                                                                                                                                                                                                                                                                                                                                                                                                              |
|------------------------------|--------------------------------------------------------------------------------------------------------------|----------------------------------------------------------------------------------------------------------------------------------------------------------------------------------------------------------------------------------------------------------------------------------------------------------------------------------------------------------------------------------------------------------------------------------------------------------------------------------------------------------------------------------------------------------------------------------------------------------------------------------------------------------------------------------------------|
|                              |                                                                                                              | <p>experience they may have gained from involvement activities</p> <ul style="list-style-type: none"> <li>• Involvement activities - Summary of each activity, skills and experience gained, evidence such as certificates or feedback and personal reflections on their involvement in this activity</li> <li>• References - Details of relevant individuals and how known to the public contributor.</li> </ul>                                                                                                                                                                                                                                                                            |
| Data-driven                  | 'Consensus Statement on Public Involvement and Engagement with Data Intensive Health Research' <sup>44</sup> | <p>Key Principles for Public Involvement and Engagement in Data-Intensive Health Research –</p> <ol style="list-style-type: none"> <li>1. Have institutional buy-in</li> <li>2. Have clarity of purpose</li> <li>3. Be transparent</li> <li>4. Have two-way communication</li> <li>5. Be inclusive and accessible to broad publics</li> <li>6. Be ongoing</li> <li>7. Be designed to produce impact</li> <li>8. Be evaluated.</li> </ol>                                                                                                                                                                                                                                                     |
| Complexity                   | Van Voorn et al (45)                                                                                         | <ul style="list-style-type: none"> <li>• Involving patients in health economic research will require a serious investment of time and money for patients to get to a level at which they can contribute.</li> <li>• Patients need to be able to 'rise above' their condition - to find an interest in the material itself and have an objective view.</li> <li>• Proper selection procedures will have to be developed.</li> </ul>                                                                                                                                                                                                                                                           |
| Representation & data-driven | Jewell et al (46)                                                                                            | <p>Report on the setting up of a service user and carer advisory group supporting data linkage in mental health research.</p> <ul style="list-style-type: none"> <li>• The general public feel that the complexities of data linkage research may be difficult to explain in lay terms and that patients and the public have limited knowledge about data, anonymisation, aggregation, and the regulations surrounding these.</li> <li>• Training sessions were set up for all new group members. Training sought to provide members with information about data linkage, including the information governance procedures in place to protect the personal data of service users.</li> </ul> |

402

403 The specific aspect of longer-term duration that is often typical of population health studies is best  
 404 illustrated through the examination of existing longitudinal studies. Longitudinal studies involve  
 405 repeated observations of the same subjects, allowing researchers to analyse change at the individual  
 406 level. Such studies typically last decades, such as the 1970 British Cohort Study (47) or the Medical  
 407 Research Council National Survey of Health and Development (48) which started in 1946.

Considering involvement in longitudinal studies, one approach is that used by the ALSPAC study (49). Based at the University of Bristol, the Avon Longitudinal Study of Parents and Children (ALSPAC), also known as Children of the 90s, is a world-leading birth cohort study. One of the governance aspects of the study is the original cohort advisory panel (OCAP) which is made up of more than 30 study participants who meet bi-monthly to provide insights and advice on study design, methodology and acceptability for participants. The group has been running since 2006.

The main aims of the OCAP group are:

- To represent the cohort of original study children
- To review study documentation and provide feedback to CO90s staff
- To represent and convey participants' opinions about planned research exercises.

These additional sources suggest that certain solutions identified in the reviews, such as good communication and tailored training, are even more vital to PPI in population health research. One thing that emerges strongly from these studies is the idea that PPI selection and recruitment for population health research projects needs to be very carefully considered.

## UK Standards

The UK Standards proved to be a coherent framework for capturing solutions and no solution was offered that did not fit in to one of the six categories. It was, however, notable that two standards were less discussed than others: Governance and Impact. Capturing, measuring and illustrating the impact of PPI within the entire lifespan of a project is an issue that has not yet been resolved but is currently being addressed by various organisations. The absence of Governance may be a result of language use, as some attributes of Working Together were relevant in terms of this standard but were not couched in terms of Governance specifically. It was also interesting to see that Communications is a UK Standard separate from Working Together, as it was something that could be seen to be an integral part of Working Together.

## What is missing?

The solutions were matched against the problems identified as population health challenges. Not all challenges were matched by solutions as shown in the table below (Table 10). Challenges not matched to solutions are in bold and have been allocated to an appropriate UK Standard. By combining the additional challenges to those matched against solutions we can anticipate producing a more comprehensive list of things to address to help ensure that PPI within a project is both more effective in itself, and also helps to achieve better outcomes for the research.

**Table 10. Challenges of facilitating good PPI in health research matched against solutions**

| Challenges           |                                          | Solutions              |                                |
|----------------------|------------------------------------------|------------------------|--------------------------------|
| Heading              | Sub-heading                              | Attribute              | UK Standard                    |
| Resources            | Lack of budget                           | Resources              | Working Together               |
|                      | Lack of time                             | Resources              | Working Together               |
|                      | Emotional burden                         | Emotional support      | Support and Learning           |
|                      | Complicated logistics/<br>infrastructure | Structural support     | Support and Learning           |
|                      | <b>Workload too high</b>                 | -                      | <b>Working Together</b>        |
|                      | <b>Lack of incentives</b>                | -                      | <b>Inclusive Opportunities</b> |
|                      | <b>Lack of preparation</b>               | -                      | <b>Working Together</b>        |
|                      | <b>Lack of staff continuity</b>          | -                      | <b>Working Together</b>        |
|                      | Lack of support for PPI members          | Various                | Support and Learning           |
|                      | <b>Scope creep</b>                       | -                      | <b>Working Together</b>        |
| Conflict and control | Allowing power to be shared with PPI     | Relationships          | Working Together               |
|                      | Expectations (from all sides)            | Clarity                | Working Together               |
|                      | Conflicting perspectives                 | Relationships          | Working Together               |
|                      | A culture of researchers vs PPI          | Relationships          | Working Together               |
|                      | <b>Ethical concerns</b>                  | -                      | <b>Working Together</b>        |
|                      | <b>Challenging the establishment</b>     | -                      | <b>Working Together</b>        |
|                      | Differences within communities           | Community consultation | Inclusive Opportunities        |
|                      | Accepting the legitimacy of PPI          | Clarity                | Working Together               |
|                      | <b>Prioritising personal experience</b>  | -                      | <b>Communications</b>          |
|                      | <b>Scepticism (from all sides)</b>       | -                      | <b>Communications</b>          |
| Knowledge            | Unresolved conflict                      | Relationships          | Working Together               |
|                      | Processes                                | Structural support     | Support and Learning           |
|                      | Language/ jargon                         | Avoid jargon           | Communications                 |
|                      | Lack of skills or training               | As appropriate         | Support and Learning           |
|                      | Administration issues                    | Structural support     | Support and Learning           |
|                      | Working practices                        | Structural support     | Support and Learning           |



|                |                                                                           |                                  |                                |
|----------------|---------------------------------------------------------------------------|----------------------------------|--------------------------------|
| Representation | Reflecting the diversity of affected populations                          | Representation and/ or diversity | Inclusive Opportunities        |
|                | Tokenism of PPI (aka box-ticking)                                         | Representation and/ or diversity | Inclusive Opportunities        |
|                | Getting early-stage involvement                                           | Engagement                       | Working Together               |
|                | Involving children                                                        | Methods of engagement            | Inclusive Opportunities        |
|                | <b>Protecting anonymity</b>                                               | -                                | <b>Inclusive Opportunities</b> |
|                | Accessibility (venues)                                                    | Accessibility                    | Inclusive Opportunities        |
| Communication  | Lack of meaningful and timely communication leading to disenfranchisement | Ongoing/ regular updates         | Communications                 |
|                | Difficulty reporting impact of PPI                                        | Evaluation                       | Impact                         |
|                | Building relationships to sustain involvement                             | Relationships                    | Working Together               |
|                | Transparency of research process                                          | Relationships                    | Working Together               |
|                | Building trust (on all sides)                                             | Relationships                    | Working Together               |
|                | Different values within the team                                          | Relationships                    | Working Together               |

## Impact - Evaluation of PPI

Most studies focused on the impact of PPI activity on participants, researchers or the research itself – rather than setting out to formally assess what works to make PPI activity successful. For example, the Public and Patient Engagement Evaluation Tool (PPEET), developed by McMaster University in Canada, provides three questionnaires that examine involvement from the point of view of the participant, the project or the organisation (50). Although there are some tools to assess impact in PPI they tend to focus on certain aspects, for example the GRIPP2 tool assesses reporting of PPI (51). This relative lack of scrutiny makes it difficult to assess actions that a project could or should undertake to help ensure best practice in PPI.

The evaluation guidance provided on the National Institute for Health Research (NIHR) website suggests the following categories of evaluation:

- Impact log – a simple method of recording outcomes
- ‘Cube’ framework – used to evaluate the process or quality of involvement
- Public Involvement Impact Assessment Framework (PiiAF) – more comprehensive method consisting of two parts 1) planning involvement in a research project, 2) designing a plan to evaluate the impact of involvement

- Realist evaluation – identifies what works for whom in what circumstances and what respects, and how (52).

Moreover, there is much still to be decided about what impact may be reasonably expected to be seen.

Brett et al (53) notes particularly the lack of any evidence of any financial analysis and Jones et al (54)

suggests that the use of contemporaneous real time data concerning PPI within surgical trials,

currently lacking, could be made use of. Furthermore, '[T]he impact of involvement will always be

somewhat unpredictable, because at the start of any project researchers 'don't know what they don't

know'—they do not know precisely what problems they might anticipate, until the patients/public tell

them.... One of the most important contextual factors that influence the outcome of involvement is

the researchers themselves, in particular the skills, knowledge, values and assumptions they start with.

They are often the 'subjects' who experience the impact of involvement. For this reason, the answer

to the question 'Is involvement worth doing?' will always be 'It depends' (55).

One further point of consideration is that it could be considered that the aspirational end point of PPI

would be that any involvement would become so integral to the project that it would be difficult to

unpick whose contribution had led to an impact or outcome not originally anticipated.

Developing new tools for use in population health research

Based the synthesis of reviews, a guidance framework for use in health research projects including

PPI and based on the UK Standards was developed (Supporting Information 4). It combines the

solutions and outstanding challenges taken from the review of reviews and aims to provide a useful

tool for researchers to enhance and improve their PPI activity within population health and general

health research.

From this framework, and with additional information taken from the studies detailed in Table 9, the

following table (Table 11) has been developed which looks specifically at actions which could help

mitigate the key challenges of PPI in population health research.

**Table 11. Recommended actions to address PPI in population health research**

### **Representation:**

- Use a variety of methods and partners to recruit a range of PPI members with different knowledge, skills and experience at relevant points in the project lifecycle.
- To fit better with wider community context, include relevant stakeholders and agencies also clinicians, charities, specialist support services plus patient and advocacy groups, be proactive and go out and get involved, don't expect people to come to you, build more meaningful relationships with the target population.

### **Complexity & Data-Driven:**

- Allow for the formal development of knowledge and skills, supporting PPI team members to be informed and make informed decisions and to understand specific parts of the research process and/or context.
- Make learning relevant to the specific context of the research and at the appropriate level for the PPI team member to allow full participation and to build participant capacity.
- Provide training in research components to give PPI team members confidence in their involvement and to explain 'rules' and constraints of research.
- Use a variety of methods such as supervision, mentoring, formal training, workshops and team-based sessions, include everyone on the team if possible.

### **Duration:**

All of the aspects above are important and need to be considered dynamically throughout the duration of the project.

Generally, researchers should plan for an evolving and varied PPI contribution over time with different PPIs being brought into the project to meet the specific requirements at the time. It may however be useful to maintain a continuous thread of a core group of PPI team members to ensure continuity.

Additional key components regarding the typically longer duration of population health projects are:

- Communication – clear, accessible and timely communications using different methods as appropriate
- Governance – clarity of roles and structures to support the project throughout its life
- Relationship building – take time to build strong, meaningful relationships to improve PPI retention and understanding
- Resources – ensure sufficient time, financial and practical resources are available for the duration of the project including lead in and post-project activity
- Staff continuity – mitigating for changes in personnel, whether principal investigator, key researchers or PPI members
- Flexibility – recognising that projects and external drivers do need to adapt to changes in a measured and managed way
- Continuous evaluation and feedback – particularly important in longer projects to ensure that everything stays on track and to ensure that any issues are picked up sufficiently early to allow change.

483

484 What these tools (Table 11 and Supporting Information 4) do not provide is:

- 485 • A comprehensive tick list style approach

- Everything you could possibly consider – only what is in the reviews
- An indication of which actions are more important than others.

Research projects are different enough from each other that generic instructions will never suit every project. These tools therefore aim to provide pointers on important areas to consider without being directive about how that might look in a particular project.

## Strengths and limitations of the review of reviews

The review of reviews was carried out using systematic processes and following production of an a priori protocol. Not all data were however complete for all reviews and there was a wide variety within the reviews that did report data. For example,

- The number of studies reported in each review varied from 4 (37) to 251 (35)
- Years searched ranged from time periods defined by the previous decade (40) to those that searched back to the inception of the databases searched (26)
- Geography also varied but, of those reviews which gave details of geographical settings, the vast majority of the studies were from the UK (n = 292), followed by the USA (n = 95) and then other areas: Canada (n = 38), Europe (n = 29), Australia (n = 25), and other countries or multiple site studies (n = 17).

The reviews covered a range of diagnostic areas ranging from generic health and social care (14) or clinical trials (41) to condition specific areas such as diabetes (33) or palliative care (17).

Interestingly there were few reviews based on demographic groups who are generally acknowledged to be under-represented in healthcare decision making:

- There was one review for Black and Asian Minority Ethnic communities (15) and the geography of the studies included were mainly in the United States.

- 511                   • There was one review for Older People (20) which covered nine qualitative articles.
- 512                   Arguably studies around dementia and palliative care may be relevant to this
- 513                   demographic but that cannot be assumed.
- 514                   • There were three reviews for Children and Young People – all of which had a specific
- 515                   focus rather than looking at the involvement of Children and Young People in PPI
- 516                   more generally:
- 517                   ▪ Children and Families in Pediatric Health Research (19)
- 518                   ▪ Disabled children (21)
- 519                   ▪ Paediatric Intensive Care (37).

520 On the positive side, Malterud et al (56) however noted the usefulness of ‘two articles [which]

521 describe in detail how individuals with limited literacy abilities can be supported to analyse and

522 communicate such processes’.

523

## 524 **Conclusions**

525 There are several important areas of PPI activity that require further research. With regards to

526 Population Health research, there remain gaps in knowledge about how to ensure key specific

527 attributes of this type of research are addressed for PPI team members – particularly around how to

528 deal with complexity and the data-driven nature of the research. Looking at the UK Standards when

529 mapped against the findings, it is clear that there is a lack of current research or clarity around

530 Governance and Impact. There could also be more research done about PPI with under-represented

531 groups. The new tools produced from the synthesis are designed to help population health

532 researchers to facilitate better PPI and in turn to conduct better research.

533

## 534 **Acknowledgements**

535 This review of reviews was discussed with the Centre for Population Health Patient and Public

536 Involvement Advisory Group which meets quarterly to help set the strategic direction for PPI within

the Centre. The draft review was read and commented on several times throughout its development by Dr. Helen Davies and Sarah Peddle – two of the PPI advisory group members. The authors would like to thank the group, and particularly Helen and Sarah, for their valuable input. The authors would also like to thank Kiara Jackson for providing input to the quality assessment section and Dr. Mayara Silveira Bianchim for input in the final version.

## Abbreviations

ALSPAC Avon Longitudinal Study of Parents and Children  
CO90s Children of the 90s  
CPH National Centre for Population Health and Wellbeing Research  
HCRW Health and Care Research Wales  
HE Health Economics  
HTA Health Technology Assessment  
IKT Integrated knowledge translation  
OCAP Original Cohort Advisory Panel  
PPEET Public and Patient Engagement Evaluation Tool  
PPE Patient and Public Engagement/ Public and Patient Engagement  
PPI Patient and Public Involvement / Public and Patient Involvement

## Declarations

### Competing interests

The authors declare that they have no competing interests

### Funding

This evidence synthesis was funded by the National Centre for Population Health and Wellbeing Research (CPH). Within the Centre for Population Health our aim is to develop research and

interventions to ‘support people’s health and well-being throughout life, with our work exploring and tackling some of today’s most difficult health and social challenges.’

The Centre for Population Health is funded by Health and Care Research Wales.

## Authors' contributions

JN and SV designed the review of reviews. SV undertook data processing and JN provided advice, oversight and checked data processing and validity. Both authors developed the manuscript and approved the final version.

## References

1. What is public involvement in research? Health Research Authority. 2020 Dec 16 [cited 2021 April 15]. Available from: <https://www.hra.nhs.uk/planning-and-improving-research/best-practice/public-involvement/>
2. Manafó E, Petermann L, Mason-Lai P, Vandall-Walker V. Patient engagement in Canada: a scoping review of the 'how' and 'what' of patient engagement in health research. Health Res Policy Syst. 2018 Mar 14;16(1):24. doi: 10.1186/s12961-018-0296-y.
3. Holmes J. What does improving population health really mean? The King’s Fund. 2022 July 21 [cited 2022 July 21]. Available from: <https://www.kingsfund.org.uk/publications/what-does-improving-population-health-mean>
4. WHO. Public Health Services [cited 2021 September 09]. Available from: <https://www.euro.who.int/en/health-topics/Health-systems/public-health-services>
5. Diez-Roux AV. On the Distinction—or Lack of Distinction—Between Population Health and Public Health. Am J Public Health. 2016 April; 106(4): 619–620. doi: 10.2105/AJPH.2016.303097
6. Ali H. I am not 'hard to reach'. UpRising. 2020 April 9 [cited 2021 November 7]. Available from: <https://www.uprising.org.uk/news/i-am-not-hard-reach>
7. Improving inclusion of under-served groups in clinical research: Guidance from INCLUDE project. National Institute for Health and Care Research, 2020 August 7 [cited 2021

588 November 7]. Available from: <https://www.nihr.ac.uk/documents/improving-inclusion-of->  
589 under-served-groups-in-clinical-research-guidance-from-include-project/25435

590 8. Wildridge, V & Bell, L 2002, 'How clip became eclipse: A mnemonic to assist in searching  
591 for health policy/management information', *Health Information & Libraries Journal*, vol. 19,  
592 no. 2, pp. 113-115.

593 9. AMSTAR 2 – The new and improved AMSTAR. AMSTAR. 2021 [cited 2021 April 15].  
594 Available from: <https://amstar.ca/Amstar-2.php>

595 10. CASP Checklists. CASP [cited April 15]. Available from: <https://casp-uk.net/casp-tools->  
596 checklists/

597 11. Iliffe S, Wilcock J, Drennan V, et al. Changing practice in dementia care in the community:  
598 developing and testing evidence-based interventions, from timely diagnosis to end of life  
599 (EVIDEM). Southampton (UK): NIHR Journals Library; 2015 Apr. (Programme Grants for  
600 Applied Research, No. 3.3.) Appendix 65, Chapter 5: Five main stages in framework  
601 analysis. [cited December 12]. Available from:  
602 <https://www.ncbi.nlm.nih.gov/books/NBK286110/>

603 12. The UK Standards: Setting the scene. UK Standards for Public Involvement. [cited 2021  
604 April 09]. Available from: [https://sites.google.com/nihr.ac.uk/pi-standards/standards/setting-](https://sites.google.com/nihr.ac.uk/pi-standards/standards/setting-the-scene)  
605 the-scene

606 13. Boote J, Telford R, Cooper C. Consumer involvement in health research: a review and  
607 research agenda. *Health Policy*. 2002 Aug;61(2):213-36. doi: 10.1016/s0168-8510(01)00214-  
608 7. PMID: 12088893.

609 14. Brett J, Staniszewska S, Mockford C, Herron-Marx S, Hughes J, et al. A systematic review of  
610 the impact of patient and public involvement on service users, researchers and communities.  
611 *Patient*. 2014;7(4):387-95. doi: 10.1007/s40271-014-0065-0. PMID: 25034612.

612 15. Dawson S, Campbell SM, Giles SJ, Morris RL, Cheraghi-Sohi S. Black and minority ethnic  
613 group involvement in health and social care research: A systematic review. *Health Expect*.  
614 2018 Feb;21(1):3-22. doi: 10.1111/hex.12597. Epub 2017 Aug 15. PMID: 28812330;  
615 PMCID: PMC5750731.



16. Zych MM, Berta WB, Gagliardi AR. Conceptualising the initiation of researcher and research user partnerships: a meta-narrative review. *Health Res Policy Sys* 18, 24 (2020). doi.org/10.1186/s12961-020-0536-9
17. Scholz B, Bevan A, Georgousopoulou E, Collier A, Mitchell I. Consumer and carer leadership in palliative care academia and practice: A systematic review with narrative synthesis. *Palliat Med*. 2019 Sep;33(8):959-968. doi: 10.1177/0269216319854012. Epub 2019 Jun 14. PMID: 31199194.
18. Pii KH, Schou LH, Piil K, Jarden M. Current trends in patient and public involvement in cancer research: A systematic review. *Health Expect*. 2019 Feb;22(1):3-20. doi: 10.1111/hex.12841. Epub 2018 Oct 30. PMID: 30378234; PMCID: PMC6351419.
19. Flynn R, Walton S, Scott SD. Engaging children and families in pediatric Health Research: a scoping review. *Res Involv Engagem* 5, 32 (2019). doi.org/10.1186/s40900-019-0168-9
20. Baldwin JN, Napier S, Neville S, Wright-St Clair VA. Impacts of older people's patient and public involvement in health and social care research: a systematic review. *Age Ageing*. 2018 Nov 1;47(6):801-809. doi: 10.1093/ageing/afy092. PMID: 29939208.
21. Bailey S, Boddy K, Briscoe S, Morris C. Involving disabled children and young people as partners in research: a systematic review. *Child Care Health Dev*. 2015 Jul;41(4):505-14. doi: 10.1111/cch.12197. Epub 2014 Oct 16. PMID: 25323964.
22. Brett J, Staniszewska S, Mockford C, Herron-Marx S, Hughes J, et al. Mapping the impact of patient and public involvement on health and social care research: a systematic review. *Health Expect*. 2014 Oct;17(5):637-50. doi: 10.1111/j.1369-7625.2012.00795.x. Epub 2012 Jul 19. PMID: 22809132; PMCID: PMC5060910.
23. Howard WS, Brainard J, Loke Y. et al. Patient and public involvement in health literacy interventions: a mapping review. *Res Involv Engagem* 3, 31 (2017). doi.org/10.1186/s40900-017-0081-z
24. Price A, Albarqouni L, Kirkpatrick J, Clarke M, Liew SM, Roberts N, et al. Patient and public involvement in the design of clinical trials: An overview of systematic reviews. *J Eval Clin Pract*. 2018 Feb;24(1):240-253. doi: 10.1111/jep.12805. Epub 2017 Oct 27. PMID: 29076631.

25. Bethell J, Commisso E, Rostad HM, Puts M, Babineau J, Grinbergs-Saull A, et al. Patient engagement in research related to dementia: A scoping review. *Dementia* (London). 2018 Nov;17(8):944-975. doi: 10.1177/1471301218789292. PMID: 30373460.
26. Domecq JP, Prutsky G, Elraiyah T, et al. Patient engagement in research: a systematic review. *BMC Health Serv Res* 14, 89 (2014). doi.org/10.1186/1472-6963-14-89
27. Boote J, Baird W, Beecroft C. Public involvement at the design stage of primary health research: a narrative review of case examples. *Health Policy*. 2010 Apr;95(1):10-23. doi: 10.1016/j.healthpol.2009.11.007. Epub 2009 Dec 5. PMID: 19963299.
28. Nunn JS, Tiller J, Fransquet P, Lacaze P. (2019). Public Involvement in Global Genomics Research: A Scoping Review. *Frontiers in public health*, 7, 79. doi.org/10.3389/fpubh.2019.00079
29. Sangill C, Buus N, Hybholt L, Berring LL. (2019). Service user's actual involvement in mental health research practices: A scoping review. *International Journal of Mental Health Nursing*, 28(4), 798–815. doi.org/10.1111/inm.12594
30. Fergusson D, Monfaredi Z, Pussegoda K, et al. The prevalence of patient engagement in published trials: a systematic review. *Res Involv Engagem* 4, 17 (2018). doi.org/10.1186/s40900-018-0099-x
31. Jagosh J, Macaulay AC, Pluye P, Salsberg J, Bush PL, Henderson J, et al. Uncovering the benefits of participatory research: implications of a realist review for health research and practice. *Milbank Q*. 2012 Jun;90(2):311-46. doi: 10.1111/j.1468-0009.2012.00665.x. PMID: 22709390; PMCID: PMC3460206.
32. Camden C, Shikako-Thomas K, Nguyen T, Graham E, Thomas A, Sprung J, et al. Engaging stakeholders in rehabilitation research: a scoping review of strategies used in partnerships and evaluation of impacts. *Disabil Rehabil*. 2015;37(15):1390-400. doi: 10.3109/09638288.2014.963705. Epub 2014 Sep 22. PMID: 25243763.
33. Harris J, Haltbakk J, Dunning T, et al. How patient and community involvement in diabetes research influences health outcomes: A realist review. *Health Expect*. 2019;22(5):907-920. doi:10.1111/hex.12935

- 672 34. Baines RL, Regan de Bere S. Optimizing patient and public involvement (PPI): Identifying its  
673 "essential" and "desirable" principles using a systematic review and modified Delphi  
674 methodology. *Health Expect*. 2018 Feb;21(1):327-335. doi: 10.1111/hex.12618. Epub 2017  
675 Sep 19. PMID: 28929554; PMCID: PMC5750770.
- 676 35. Vaughn LM, Whetstone C, Boards A, Busch MD, Magnusson M, Määttä S. Partnering with  
677 insiders: A review of peer models across community-engaged research, education and social  
678 care. *Health Soc Care Community*. 2018 Nov;26(6):769-786. doi: 10.1111/hsc.12562. Epub  
679 2018 Mar 7. PMID: 29512217.
- 680 36. Chambers E, Gardiner C, Thompson J, Seymour J. Patient and carer involvement in palliative  
681 care research: An integrative qualitative evidence synthesis review. *Palliat Med*. 2019  
682 Sep;33(8):969-984. doi: 10.1177/0269216319858247. Epub 2019 Jun 28. PMID: 31250702;  
683 PMCID: PMC6691598.
- 684 37. Menzies JC, Morris KP, Duncan HP. et al. Patient and public involvement in Paediatric  
685 Intensive Care research: considerations, challenges and facilitating factors. *Res Involv*  
686 *Engagem* 2, 32 (2016). doi.org/10.1186/s40900-016-0046-7
- 687 38. Shippee ND, Domecq GJP, Prutsky LGJ, Wang Z, Elraiyah TA, Nabhan M, et al. Patient and  
688 service user engagement in research: a systematic review and synthesized framework. *Health*  
689 *Expect*. 2015 Oct;18(5):1151-66. doi: 10.1111/hex.12090. Epub 2013 Jun 3. PMID:  
690 23731468; PMCID: PMC5060820.
- 691 39. Dawson S, Campbell SM, Giles SJ, Morris RL, Cheraghi-Sohi S. Black and minority ethnic  
692 group involvement in health and social care research: A systematic review. *Health Expect*.  
693 2018 Feb;21(1):3-22. doi: 10.1111/hex.12597. Epub 2017 Aug 15. PMID: 28812330;  
694 PMCID: PMC5750731.
- 695 40. Pii KH, Schou LH, Piil K, Jarden M. Current trends in patient and public involvement in  
696 cancer research: A systematic review. *Health Expect*. 2019 Feb;22(1):3-20. doi:  
697 10.1111/hex.12841. Epub 2018 Oct 30. PMID: 30378234; PMCID: PMC6351419.

- 698 41. Crocker JC, Ricci-Cabello I, Parker A, Hirst JA, Chant A, Petit-Zeman S, et al. Impact of  
699 patient and public involvement on enrolment and retention in clinical trials: systematic review  
700 and meta-analysis BMJ 2018; 363 :k4738 doi:10.1136/bmj.k4738
- 701 42. Johnson H, Davies JM, Leniz J, Chukwusa E, Markham S, Sleeman KE. Opportunities for  
702 public involvement in big data research in palliative and end-of-life care. Palliative Medicine.  
703 2021;35(9):1724-1726. doi:10.1177/02692163211002101
- 704 43. Hobbs G, Tully MP. Realist evaluation of public engagement and involvement in data-  
705 intensive health research. Res Involv Engagem 6, 37 (2020). doi.org/10.1186/s40900-020-  
706 00215-4
- 707 44. Aitken M, Tully MP, Porteous C, Denegri S, Cunningham-Burley S, Banner N, et al. (2020)  
708 “Consensus Statement on Public Involvement and Engagement with Data-Intensive Health  
709 Research”, International Journal of Population Data Science, 4(1). doi:  
710 10.23889/ijpds.v4i1.586.
- 711 45. van Voorn GA, Vemer P, Hamerlijck D, et al. The Missing Stakeholder Group: Why  
712 Patients Should be Involved in Health Economic Modelling. Appl Health Econ Health Policy.  
713 2016;14(2):129-133. doi:10.1007/s40258-015-0200-7
- 714 46. Jewell A, Pritchard M, Barret, K. et al. The Maudsley Biomedical Research Centre (BRC)  
715 data linkage service user and carer advisory group: creating and sustaining a successful  
716 patient and public involvement group to guide research in a complex area. Res Involv  
717 Engagem 5, 20 (2019). doi.org/10.1186/s40900-019-0152-4
- 718 47. 1970 British Cohort Study. Centre for Longitudinal Studies. [cited 2021 November 7].  
719 Available from: <https://cls.ucl.ac.uk/cls-studies/1970-british-cohort-study/>
- 720 48. National Survey of Health and Development. Medical Research Council. [cited 2021  
721 November 7]. Available from: <https://www.nshd.mrc.ac.uk/>
- 722 49. Avon Longitudinal Study of Parents and Children. University of Bristol. [cited 2021  
723 November 7]. Available from: <http://www.bristol.ac.uk/alspac/about/>

50. Public and Patient Engagement Evaluation Tool. Faculty of Health Sciences. [cited 2021 November 25]. Available from: <https://ppe.mcmaster.ca/our-products/public-patient-engagement-evaluation-tool>
51. Staniszewska S, Brett J, Simera I, Seers K, Mockford C, Goodlad S et al. GRIPP2 reporting checklists: tools to improve reporting of patient and public involvement in research BMJ 2017; 358 :j3453 doi:10.1136/bmj.j3453
52. Kok M (2018) Guidance Document: Evaluating public involvement in research. UWE Bristol. [UWE Bristol e-prints repository]
53. Brett J, Staniszewska S, Mockford C, Seers K, Herron-Marx S, Bayliss H. The PIRICOM study: a systematic review of the conceptualisation, measurement, impact and outcomes of patients and public involvement in health and social care research: University of Warwick; 2010.
54. Jones EL, Williams-Yesson BA, Hackett RC, Staniszewska SH, Evans D, Francis NK. Quality of reporting on patient and public involvement within surgical research: a systematic review. Ann Surg. 2015 Feb;261(2):243-50. doi: 10.1097/SLA.0000000000000768. PMID: 24950279.
55. Staley, K. 'Is it worth doing?' Measuring the impact of patient and public involvement in research. Res Involv Engagem 1, 6 (2015). doi.org/10.1186/s40900-015-0008-5
56. Malterud K, Elvbakken KT. Patients participating as co-researchers in health research: A systematic review of outcomes and experiences. Scand J Public Health. 2020 Aug;48(6):617-628. doi: 10.1177/1403494819863514. Epub 2019 Jul 18. PMID: 31319762.
57. Jenkins M. Evaluation of methodological search filters--a review. Health Info Libr J. 2004 Sep;21(3):148-63. doi: 10.1111/j.1471-1842.2004.00511.x.
58. Manafò E, Petermann L, Vandall-Walker V, Mason-Lai P (2018) Patient and public engagement in priority setting: A systematic rapid review of the literature. PLoS ONE 13(3):e0193579. doi.org/10.1371/journal.pone.0193579.
59. Ocloo J, Garfield S, Dawson S, et al. Exploring the theory, barriers and enablers for patient and public involvement across health, social care and patient safety: a protocol for a

752 systematic review of reviews. BMJ Open 2017;7:e018426. doi:10.1136/bmjopen-2017-  
753 018426  
754 60. Rogers M, Bethel A, Boddy K. Development and testing of a MEDLINE search filter for  
755 identifying patient and public involvement in health research. Health Information & Libraries  
756 Journal, 34, pp. 125–133  
757

## Supporting Information

**S1 File. Search Strategy.** Full search strategy used.

**S2 Table. Quality Assessments.** Results of the quality Assessment.

**S3 Table. Full list of included studies.** A description of all included studies is provided as a table.

**S4 Table. PPI Guidance Framework.** Full PPI Guidance Framework.

## Figure 1 – PRISMA Flow Diagram

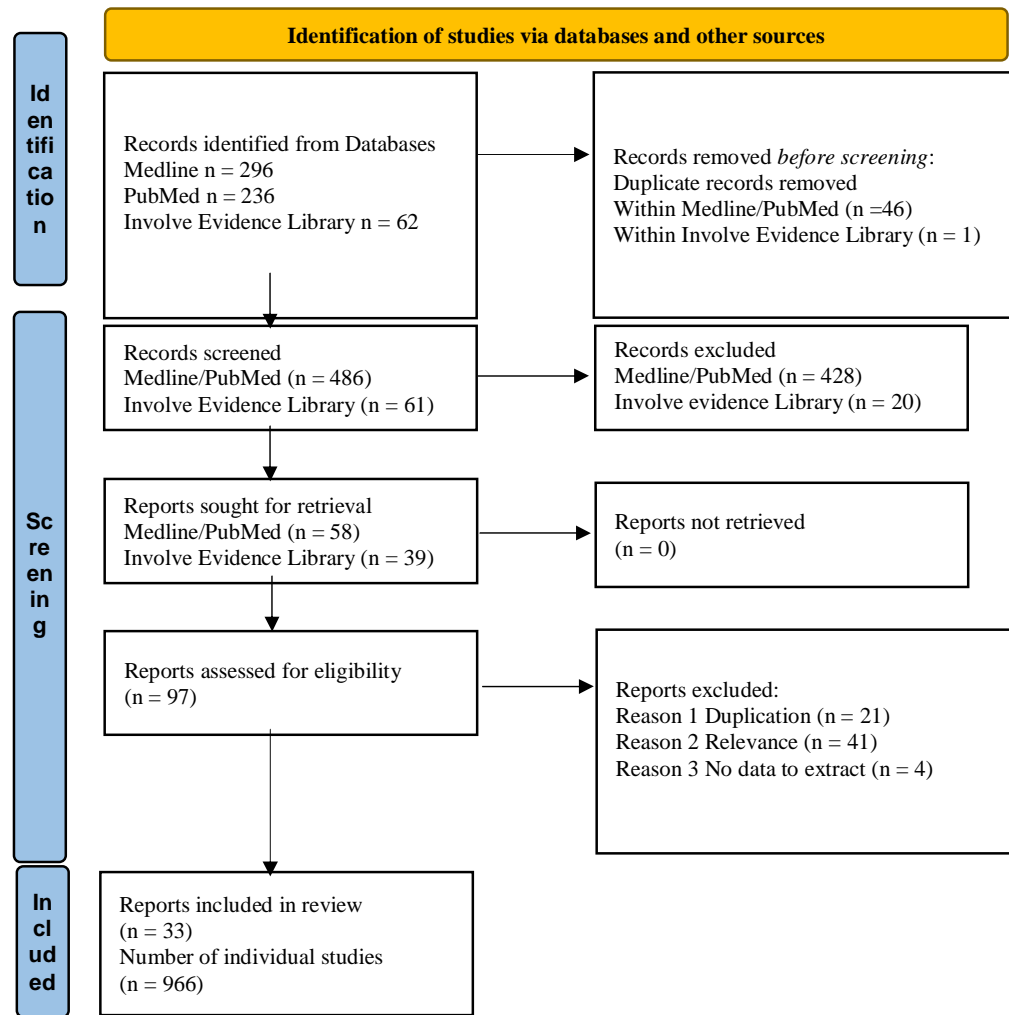

### PRISMA Flow Diagram

\* This number is incomplete due to missing information on some papers. Duplicates have been removed (original n = 1222).
